# Supplementary material for: The Impact of Frailty on Outcomes of Proximal Aortic Aneurysm Surgery: A Nationwide Analysis
Source: MDPI journal article supplement (doi:10.3390/jcdd11010032), 2024-01-20
Supplement: s1 [file s1]

## Supplementary Materials:

**Table S1.** Adjusted Analysis Showing Age As A Predictor For Various Post-Operative Outcomes.

| Outcome              | Odds Ratio | 95% Confidence Interval |      | P-Value       |
|----------------------|------------|-------------------------|------|---------------|
| Death                | 1.02       | 0.96                    | 1.08 | 0.514         |
| Stroke               | 1.12       | 0.99                    | 1.27 | 0.084         |
| Acute Kidney Injury  | 1.02       | 1.01                    | 1.04 | <b>0.013*</b> |
| Pacemaker Insertion  | 0.99       | 0.95                    | 1.03 | 0.699         |
| Complete Heart Block | 1.00       | 0.97                    | 1.03 | 0.894         |
| Major Bleeding       | 1.00       | 0.98                    | 1.02 | 0.940         |
| MACE                 | 1.00       | 0.99                    | 1.02 | 0.568         |

MACE- Major Adverse Cardiac Event defined as composite of death, stroke, acute kidney injury, and major bleeding. \*P-value  $\leq 0.05$  was considered statistically significant.

**Table S2.** Sensitivity Analysis Examining In-Hospital Outcomes Stratified by Hospital Frailty Risk Score.

|                             | Overall (N=1149) | Low HFS<br>(N=772) | Intermediate HFS<br>(N=366) | High HFS<br>(N=11) | p-value          |
|-----------------------------|------------------|--------------------|-----------------------------|--------------------|------------------|
| <b>In-Hospital Outcomes</b> |                  |                    |                             |                    |                  |
| Mortality                   | 30 (2.6%)        | 8 (1.0%)           | 21 (5.7%)                   | 1 (9.1%)           | <b>&lt;0.001</b> |
| Stroke                      | 34 (3.0%)        | 4 (0.5%)           | 24 (6.6%)                   | 6 (54.6%)          | <b>&lt;0.001</b> |
| Renal failure               | 192 (16.7%)      | 58 (7.5%)          | 130 (35.5%)                 | 4 (36.4%)          | <b>&lt;0.001</b> |
| Complete heart block        | 75 (6.5%)        | 48 (6.2%)          | 26 (7.1%)                   | 1 (9.1%)           | 0.80             |
| Major bleeding              | 660 (57.4%)      | 403 (52.2%)        | 252 (68.9%)                 | 5 (45.5%)          | <b>&lt;0.001</b> |

HFS = Hospital Frailty Risk Score (Low: <5, Intermediate: 5-15, High: >15).

**Boldface values denote statistical significance. Categorical variables were analyzed using chi-square tests.**
